# Supplementary material for: Synthesis of functionalized nanoporous biocarbons with high surface area for CO2 capture and supercapacitor applications
Source: Royal Society of Chemistry journal article supplement (doi:10.1039/d1gc01376a), 2021-01-01
Supplement: d1gc01376a1.pdf [file d1gc01376a1.pdf]

**Electronic Supplementary Information**

**Synthesis of high surface area and functionalized nanoporous biocarbons and their efficiency for CO<sub>2</sub> capture and supercapacitors**

Gurwinder Singh,<sup>\*a</sup> Rohan Bahadur,<sup>a</sup> Ajanya M Ruban,<sup>a</sup> Jefrin Davidraj,<sup>a</sup> Dawei Su,<sup>b</sup> and Ajayan Vinu <sup>\*a</sup>

<sup>a</sup>Global Innovative Center for Advanced Nanomaterials (GICAN), College of Engineering, Science, and Environment, The University of Newcastle, Callaghan, NSW 2308, Australia

<sup>b</sup>Center for Clean Energy Technology, School of Mathematical and Physical Science, Faculty of Science, University of Technology Sydney, NSW 2007 Australia

**\*Main corresponding author**

E-mail: [Ajayan.Vinu@newcastle.edu.au](mailto:Ajayan.Vinu@newcastle.edu.au)

## Tables

| Material | Carbon (%) | Nitrogen (%) | Oxygen (%) |
|----------|------------|--------------|------------|
| CPC-1    | 85.4       | 5.3          | 9.3        |
| CPC-2    | 90.9       | 1.3          | 7.7        |
| CPC-3    | 93.0       | 0.6          | 6.3        |
| CPC-4    | 89.8       | 0.9          | 8.2        |

**Table S1.** XPS surface composition of the synthesized materials

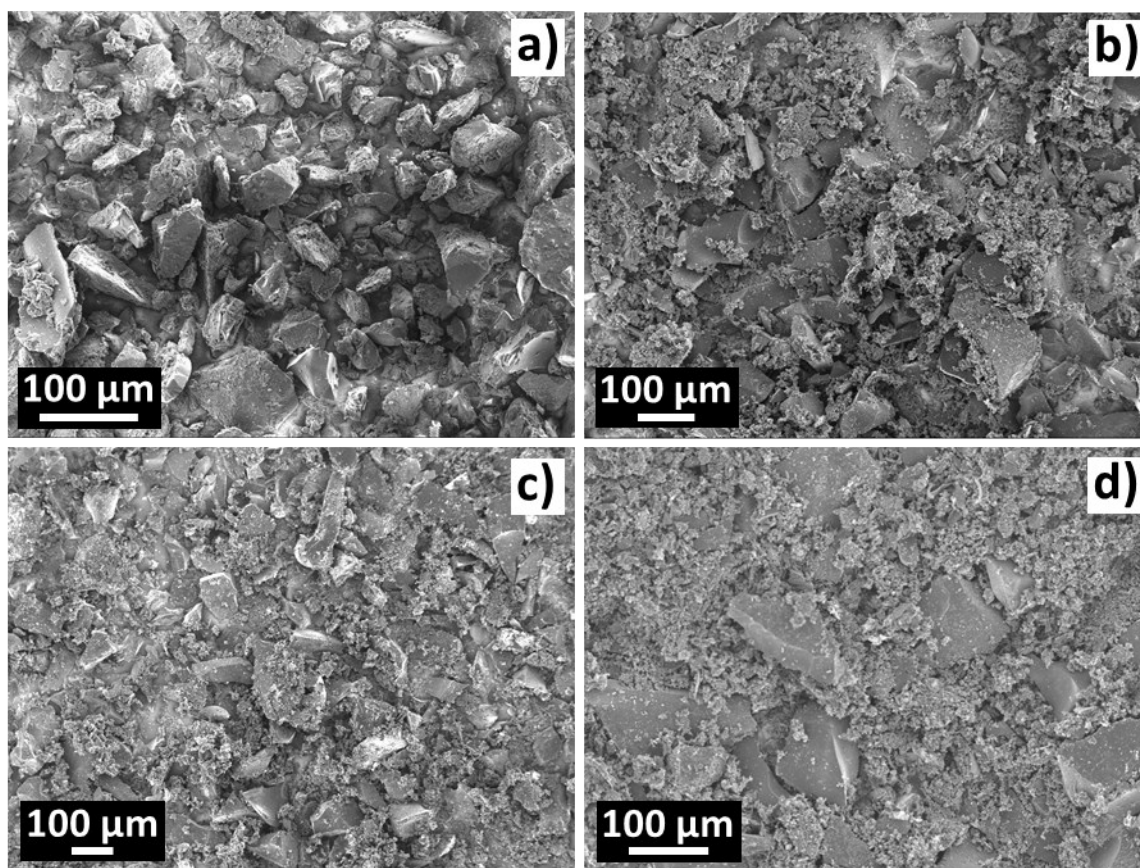

Figures

**Fig. S1:** SEM images of the synthesized porous carbons a) CPC-1, b) CPC-2, c) CPC-3, and d) CPC-4 taken at 100  $\mu\text{m}$ .

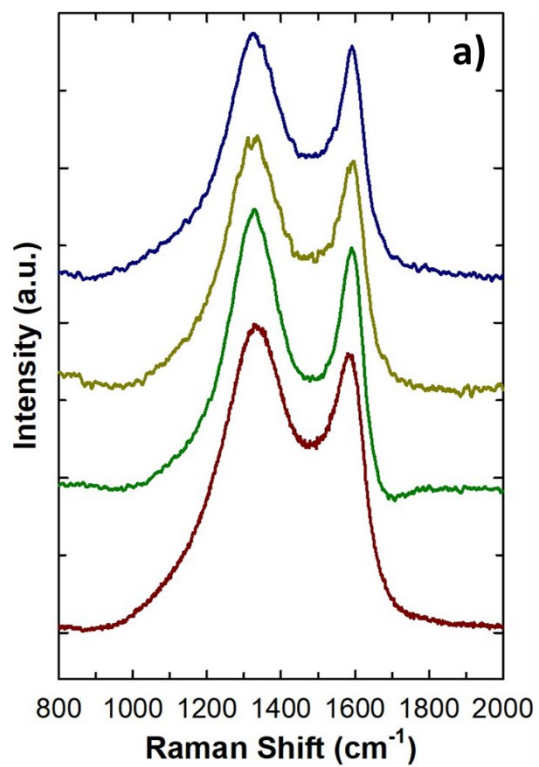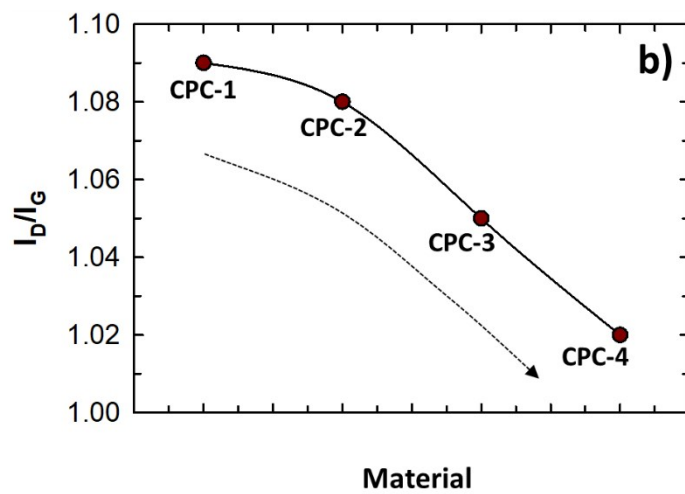

**Fig. S2:** a) Raman spectra and b)  $I_D/I_G$  ratio of the synthesized porous carbons a) CPC-1, b) CPC-2, c) CPC-3, and d) CPC-4

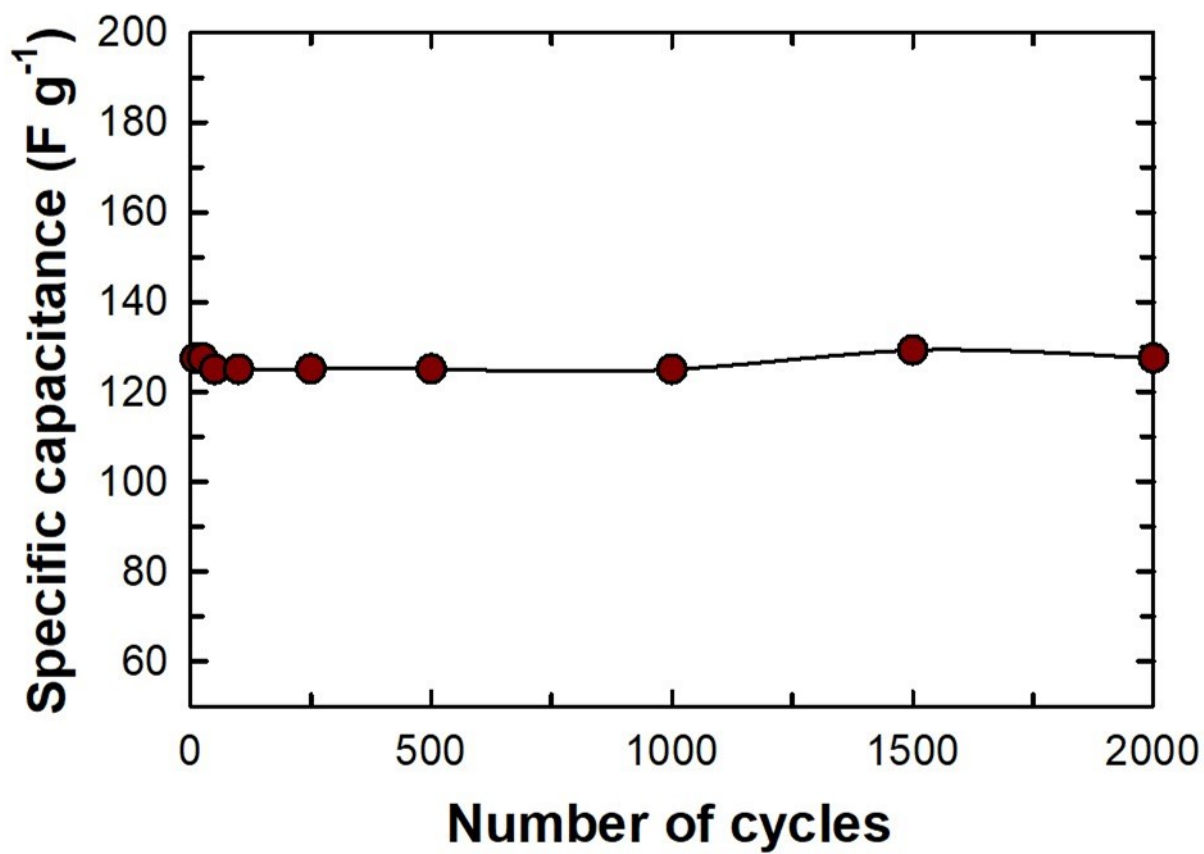

**Fig. S3:** Specific capacitance cycling stability of CPC-3 observed for 2000 cycles at a current density of 5 A g<sup>-1</sup>.

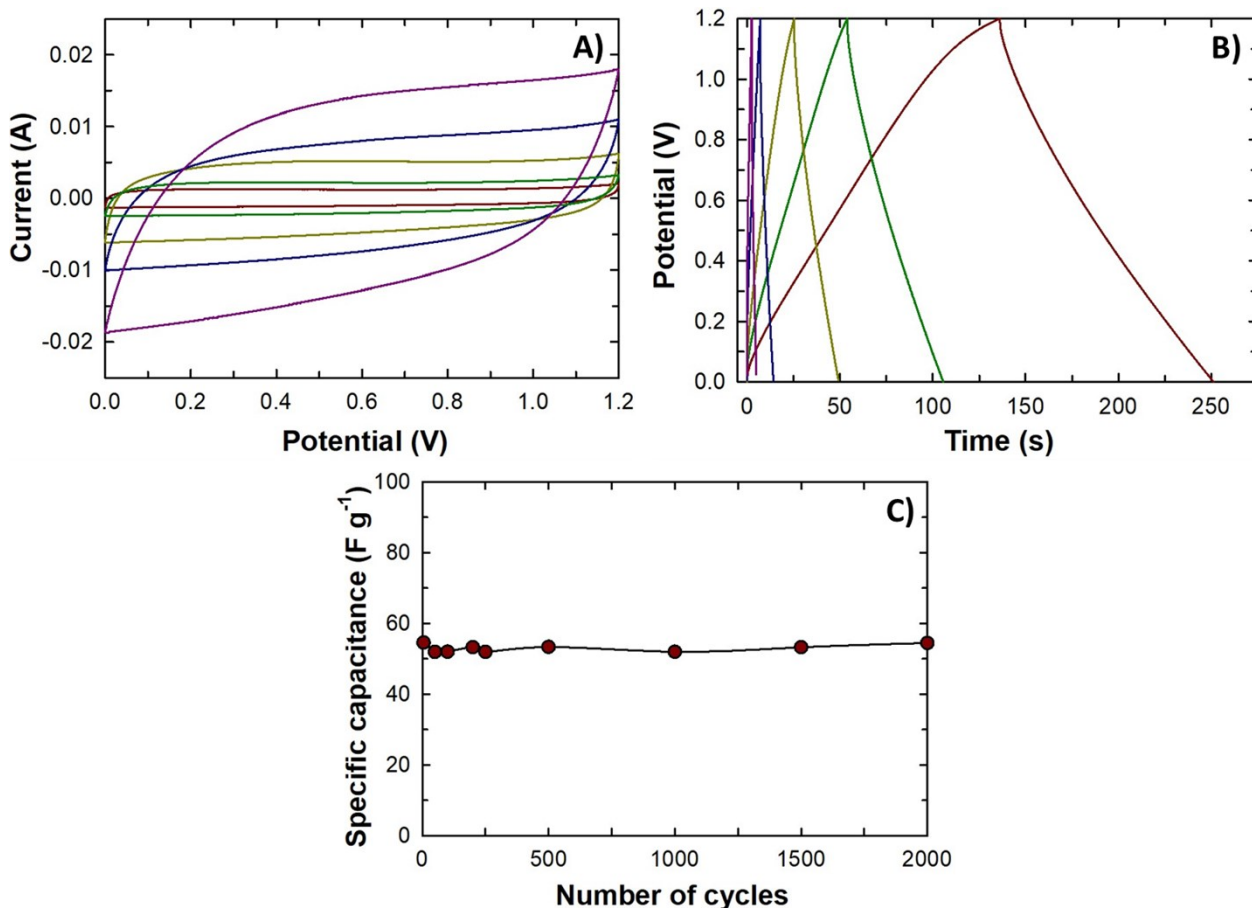

**Fig. S4:** Electrochemical performance of CPC-3 measured in a two-electrode system in the 3M KOH electrolyte; **A)** Cyclic voltammetry (CV) curves obtained at different scan rates, **B)** galvanostatic charge-discharge (CD) curves obtained at different current densities, **C)** cycling stability at 5 A g<sup>-1</sup> over 2000 cycles

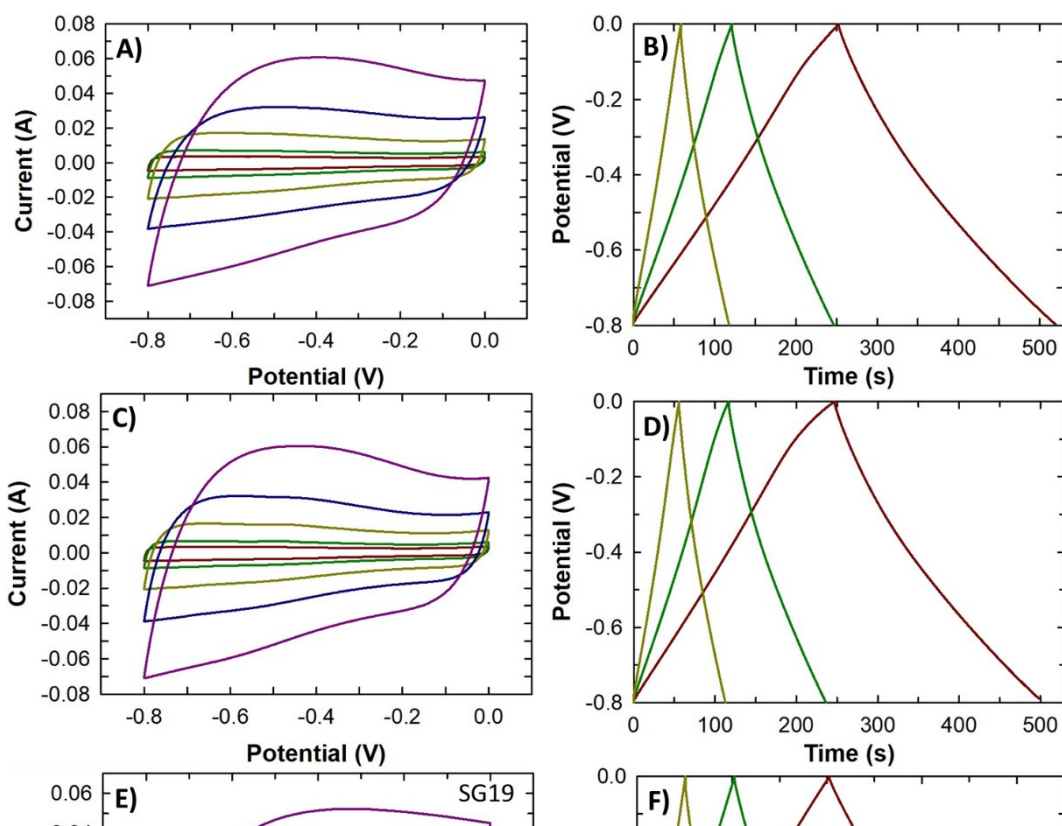

**Fig. S5:** The CV and CD plot of CPC-1 (**A and B**), CPC-2 (**C and D**), and CPC-4 (**E and F**)
